# Supplementary material
Source: publisher site journal article supplement (https://www.dovepress.com/article/411819)
Supplement: Supplementary file 1 [file get_supplementary_file.php]

Supporting Information

**Preparation of apoptotic extracellular vesicles from adipose tissue and their efficacy in promoting high-quality skin wound healing**

Jia Dong1,*, Bin Wu1, Weidong Tian2,3,*

**Supplementary Table S1. Primers for qRT-PCR.**

| **Target cDNA** | **Primer sequence (5’-3’)** |
| --- | --- |
| **human-GAPDH** | **CTTTGGTATCGTGGAAGGACTC**  **GTAGAGGCAGGGATGATGTTCT** |
| **human-PPARγ** | **CATTCTGGCCCACCAACTTTGG**  **TGGAGATGCAGGCTCCACTTTG** |
| **human-C/EBPα** | **AGGTTTCCTGCCTCCTTCC**  **CCCAAGTCCCTATGTTTCCA** |
| **human-Col 1** | **AACATGGAGACTGGTGAGACCT**  **CGCCATACTCGAACTGGAATC** |
| **human-Col 3** | **CTTCTCTCCAGCCGAGCTTC**  **TGTGTTTCGTGCAACCATCC** |
| **human-α-SMA** | **CTTCGTTACTACTGCTGAGCGTGAG**  **CCCATCAGGCAACTCGTAACTCTTC** |
